# Supplementary material for: Generation of human-pig chimeric renal organoids using iPSC technology
Source: PubMed Central journal article supplement — Commun Biol. 2024 Oct 8;7:1278. doi: 10.1038/s42003-024-06986-w (PMC11458617; doi:10.1038/s42003-024-06986-w), 2024-10-08
Supplement: 42003_2024_6986_MOESM3_ESM.pdf [file 42003_2024_6986_MOESM3_ESM.pdf]

## **Description of Additional Supplementary Files**

**File name: Supplementary Data 1**

**Description:** The source data behind the graphs in the paper.

**File name: Supplementary Movie 1**

**Description:** Z-stack images of engraftment of human NPCs beneath the mouse embryonic renal capsule.
